# Supplementary material for: Aptamer recognition-trigged label-free homogeneous electrochemical strategy for an ultrasensitive cancer-derived exosome assay
Source: Royal Society of Chemistry journal article supplement (doi:10.1039/c9cc07253e), 2019-01-01
Supplement: c9cc07253e1.pdf [file c9cc07253e1.pdf]

## **Supporting Information**

### **Aptamer recognition-triggered label-free homogeneous electrochemical strategy for ultrasensitive cancer-derived exosome assay**

Xuehan Yin, Ting Hou, Bingzheng Huang, Limin Yang\* and Feng Li\*

College of Chemistry and Pharmaceutical Sciences, Qingdao Agricultural University,

Qingdao 266109, People's Republic of China

\* Corresponding authors. Tel/Fax: 86-532-86080855

E-mail: lifeng@qau.edu.cn (F. Li)

## **Experimental section**

### **Reagents**

Tris(hydroxymethyl)aminomethane (Tris), hydrochloric acid (HCl), sodium chloride (NaCl), magnesium chloride ( $\text{MgCl}_2 \cdot 6\text{H}_2\text{O}$ ), methylene blue and doxorubicin hydrochloride were obtained from Sinopharm Chemical Reagent Co., Ltd. (Shanghai, China). Exo-spin™ kit was supplied by Shanghai XP Biomed Ltd. (Shanghai, China). Cell medium RPMI 1640 and fetal bovine serum (FBS) were purchased from Biological Industries Co., Ltd. (Beit-Haemek, Israel). The human breast cancer cell line MCF-7 and human hepatocyte cell line HL-7702 were bought from Procell Life Science Co., Ltd. (Wuhan, China). All of the chemicals were of analytical reagent grade. Ultrapure water (18.2 MΩ) produced by a Milli-Q water purification system (Millipore) was applied to prepare all aqueous solutions. All DNA probes used in this work were provided by Sangon Biotechnology Co., Ltd. (Shanghai, China) and all DNA sequences were shown in Table S1.

### **Apparatus**

Transmission electron microscopy (TEM) was measured using the HT7700 microscope (Hitachi, Japan). The collected exosomes were loaded on the TEM grid and stained with phosphotungstic acid before TEM characterization. Polyacrylamide gel electrophoresis (PAGE) was carried out on a Bio-Rad electrophoresis system (Bio-Rad, USA), and imaged on a Gel Doc XR + Imaging System (Bio-Rad, USA). PAGE (12%) was carried out in  $1 \times$  TBE buffer (tris borate-EDTA) with 95 V for 1.5 h and stained for 30 min in a GelRed solution. Differential pulse voltammetric (DPV) tests were recorded on an Autolab electrochemical workstation (Metrohm, Netherlands) using a three-electrode system: an indium tin oxide (ITO) working electrode, an Ag/AgCl reference electrode and a platinum counter electrode. The potential swept from -0.7 V to -0.4 V, and the modulation amplitude, the modulation time, and the interval time were set to values of 0.025 V, 0.05 s, and 0.5 s. Before measurement, the ITO electrode was treated with ethanol and water for 30 min repeated and then dipped into NaOH (1 mM) for 6 h. Nanoparticle tracking analysis (NTA) was performed with Zetaview (Particle Metrix, Germany).

### **Cell culture and exosomes isolation**

MCF-7 and HL-7702 cells were grown in PRMI 1640 and DMEM culture medium, respectively. To produce exosomes, cells were maintained in culture medium containing 10% exosome depleted FBS. After 48 h, cell and cell debris were first removed by centrifugation ( $300 \times g$ , 10 min). Then, the exosomes were isolated using the Exo-spin™ kit (Promega) on the basis of the manufacturer's instructions. Finally, the purified exosomes were carefully resuspended in PBS and stored at  $-80\text{ }^{\circ}\text{C}$  before use. The hydrodynamic radius and the concentration of the exosomes were tested by using NTA.

### **Exo III-aided homogeneous electrochemical exosomes detection**

First, the P1-P2 was synthesized by mixing the P1 and P2 with the same concentration in buffer solution. The above mixture was heated to  $95\text{ }^{\circ}\text{C}$  for 5 min and then cooled to room temperature to make sure the formation of dsDNA P1-P2. The hairpin oligonucleotide HP was treated by the same procedures to make it form a hairpin structure. To detect exosomes, a specified concentration of exosomes was added into reaction buffer (10 mM Tris, 250 mM NaCl, 10 mM  $\text{MgCl}_2$ , pH 7.4) containing a certain amount of P1-P2. The obtained mixture was incubated at  $37\text{ }^{\circ}\text{C}$  for 30 min. Subsequently, 5  $\mu\text{L}$  of hairpin DNA HP probe (0.02  $\mu\text{M}$ ) and 5  $\mu\text{L}$  of Exo III (20 U/mL) were introduced into the above solution and further incubated at  $37\text{ }^{\circ}\text{C}$  for about 1 h. Finally, 10  $\mu\text{L}$  of Dox (0.1  $\mu\text{M}$ ) was added to the above solution for 20 min. The total volume of the reaction system was 100  $\mu\text{L}$ .

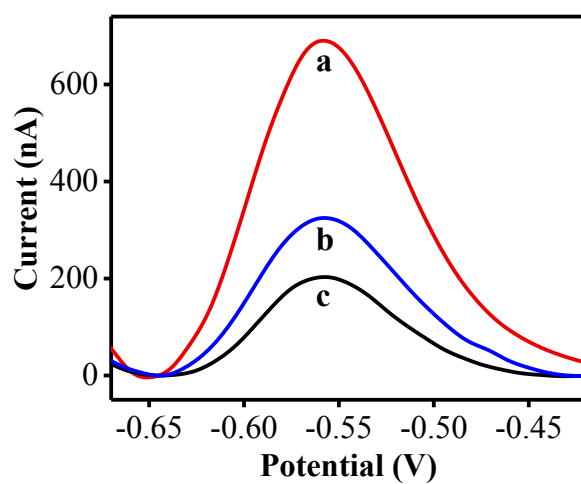

Fig. S1 DPV responses of DOX under different conditions: (a) DOX; (b) DOX + HP1; (c) DOX + HP2. The concentrations of DOX, HP1 and HP2 were 0.1  $\mu\text{M}$ , 0.02  $\mu\text{M}$  and 0.02  $\mu\text{M}$  respectively.

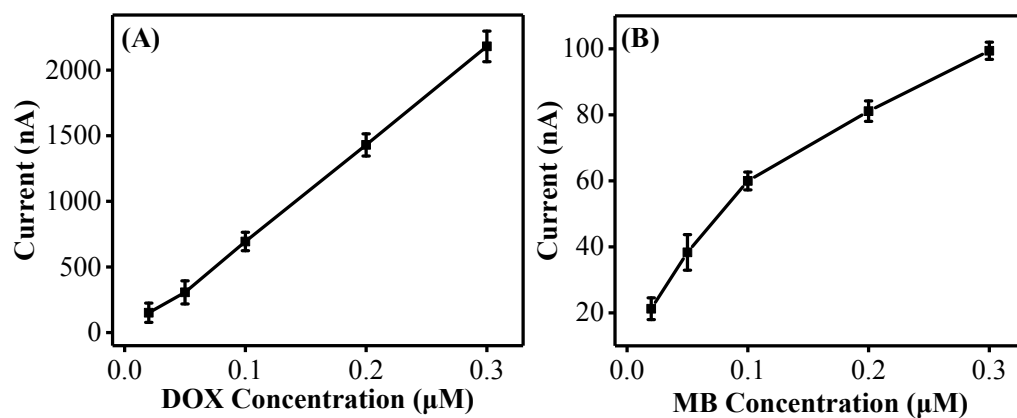

Fig. S2 DPV peak current of DOX (A) and MB (B) under different concentrations.

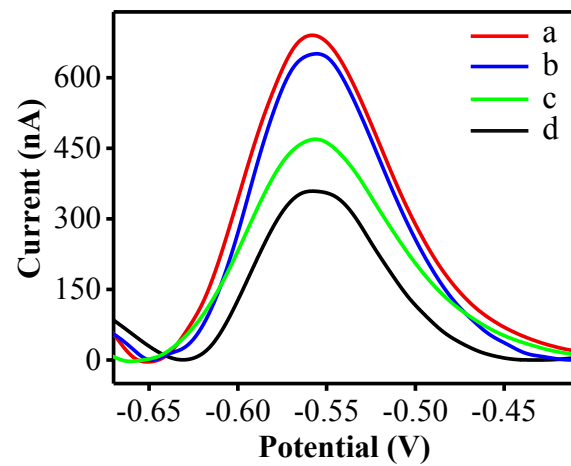

Fig. S3 DPV responses of DOX under different kinds of buffer solutions: (a) Tris-HCl; (b) MES; (c) PBS; (d) HEPES. The concentration of DOX was 0.1  $\mu\text{M}$ .

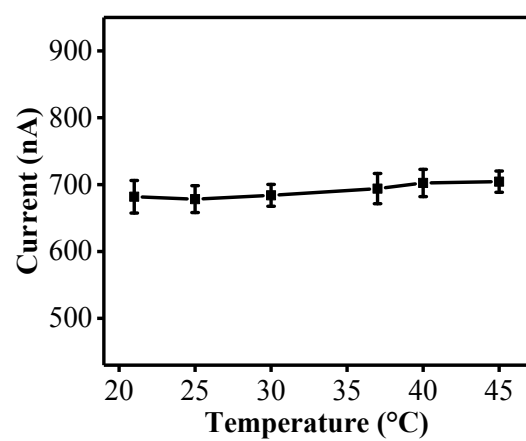

Fig. S4 The DPV peak current of DOX at different temperatures ranging from 20 to 45°C.

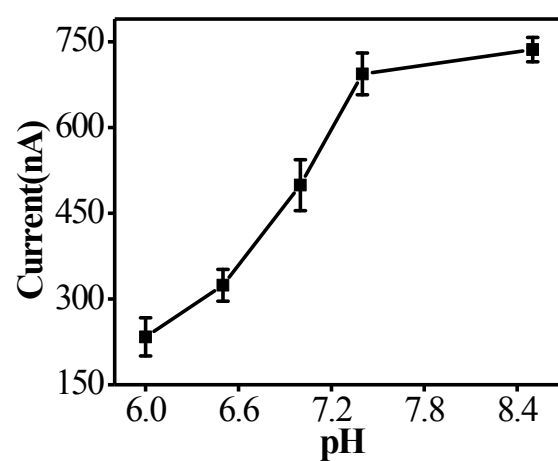

Fig. S5 The DPV peak current of DOX at different pH values ranging from 6.0 to 8.4.

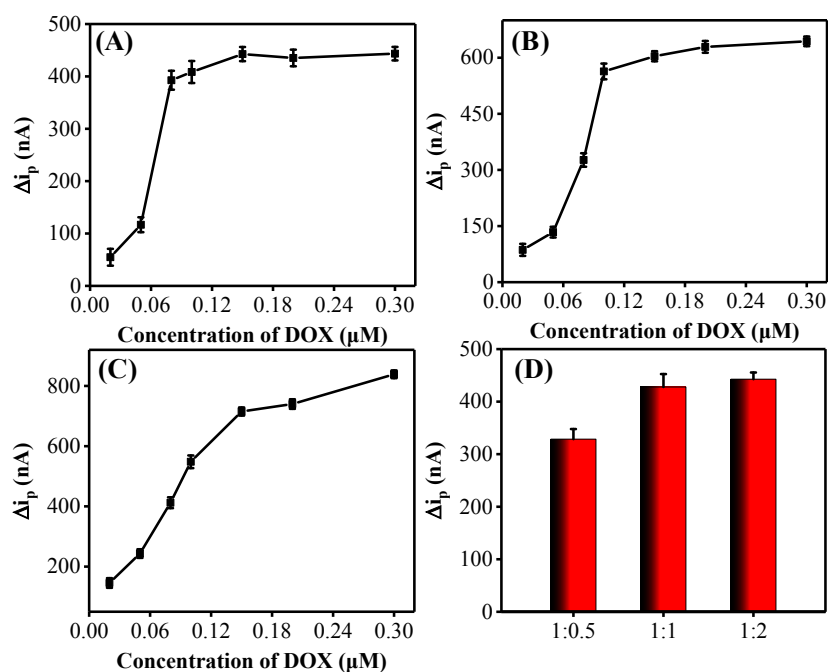

Fig. S6 DPV peak current change of DOX ( $\Delta i_p = i_p - i_{p,0}$ , in which  $i_p$  and  $i_{p,0}$  are the DPV peak currents in the presence and absence of P1-P2 and HP, respectively) under the different ratios of P1-P2 and HP: (A) P1-P2 : HP = 1 : 0.5, (B) P1-P2 : HP = 1 : 1, (C) P1-P2 : HP = 1 : 2. The concentration of P1-P2 was 0.02  $\mu\text{M}$ . (D) DPV peak current change ( $\Delta i_p = i_p - i_{p,0}$ , in which  $i_p$  and  $i_{p,0}$  are the DPV peak current in the presence and absence of exosomes, respectively) vs the different ratios of P1-P2 and HP. The concentrations of P1-P2 and exosomes were 0.02  $\mu\text{M}$  and  $3.4 \times 10^8$  particles/mL, respectively.

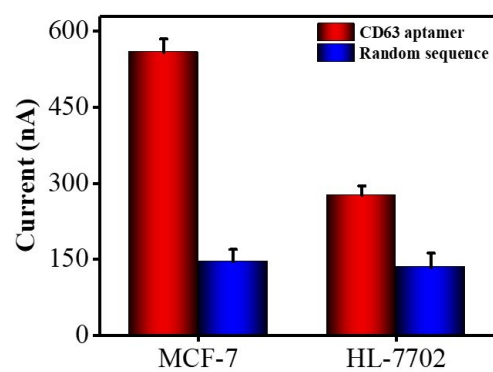

Fig. S7 Comparison of the DPV peak current in the presence of MCF-7 cells-derived exosomes and HL-7702 cells-derived exosomes respectively.

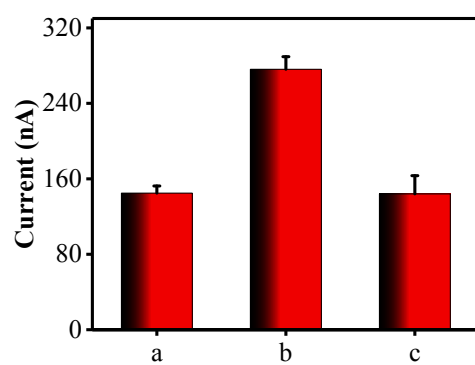

Fig. S8 DPV peak current of the proposed method in response to HL-7702 cells-derived exosomes in the culture medium. (a) culture medium, (b) HL-7702 cells culture medium, (c) HL-7702 cells culture medium filtrate.

**Table S1.** Oligonucleotide sequences used in this work

| Oligo DNA | Sequence 5'-3'                                            |
|-----------|-----------------------------------------------------------|
| P1        | CACCCACCTCGCTCCCGTGACACTAATGCTA                           |
| P2        | AGGTGGGGTGAATTTTTT                                        |
| HP        | CGACGACGTGCTTGCTTTTTTTTTTTTGCAAGCACGTCG<br>TCGTTCACCCACCT |
| P3        | CACCCACCTACGTGCTCAATTCGATCTGCAT                           |
| HP1       | CGACGACGTGCTTGCTTTTTTTTTTTTGCAAGCACGTCG<br>TCG            |
| HP2       | TTAATGAATTACTTACTTTTTTTTTTTTGTAAGTAATTC<br>ATTAA          |

Table S2 Comparison of the as-proposed strategy with other reported methods

| Method                                                                                                                                                 | LOD<br>(particles/ $\mu$ L) | Reference |
|--------------------------------------------------------------------------------------------------------------------------------------------------------|-----------------------------|-----------|
| Electrochemical sandwich immunosensor for determination of exosomes based on surface marker-mediated signal amplification                              | $2 \times 10^2$             | 1         |
| Ultrasensitive and reversible nanoplatform of urinary exosomes for prostate cancer diagnosis                                                           | 50                          | 2         |
| Ultrasensitive microfluidic analysis of circulating exosomes using a nanostructured graphene oxide/ polydopamine coating                               | 50                          | 3         |
| Label-free detection and molecular profiling of exosomes with a nano-plasmonic sensor                                                                  | $3 \times 10^3$             | 4         |
| Direct exosome quantification via bivalent-cholesterol-labeled DNA anchor for signal amplification                                                     | $2.2 \times 10^3$           | 5         |
| Aptasensor with expanded nucleotide using DNA nanotetrahedra for electrochemical detection of cancerous exosomes                                       | 20.9                        | 6         |
| A paper-supported aptasensor based on upconversion luminescence resonance energy transfer for the accessible determination of exosomes                 | $1.1 \times 10^3$           | 7         |
| Concentration-normalized electroanalytical assaying of exosome markers                                                                                 | 190                         | 8         |
| Highly sensitive electrochemical detection of tumor exosomes based on aptamer recognition-induced multi-DNA release and cyclic enzymatic amplification | 70                          | 9         |
| Ti <sub>3</sub> C <sub>2</sub> MXenes nanosheets catalyzed highly efficient electrogenerated chemiluminescence biosensor for the detection of exosomes | 125                         | 10        |
| Quantification of exosome based on a copper-mediated signal amplification strategy                                                                     | $4.8 \times 10^4$           | 11        |

|                                                                                                                                                                   |                     |           |
|-------------------------------------------------------------------------------------------------------------------------------------------------------------------|---------------------|-----------|
| Enhancement of the intrinsic peroxidase-like activity of graphitic carbon nitride nanosheets by ssDNAs and its application for detection of exosomes              | $13.52 \times 10^5$ | 12        |
| Molecular-recognition-based DNA nanodevices for enhancing the direct visualization and quantification of single vesicles of tumor exosomes in plasma microsamples | $10^3$              | 13        |
| Bridging exosome and liposome through zirconium–phosphate coordination chemistry: a new method for exosome detection                                              | $7.6 \times 10^3$   | 14        |
| Aptamer recognition-triggered label-free homogeneous electrochemical strategy for ultrasensitive cancer-derived exosome assay                                     | 12                  | This work |

## References

- 1 X. Doldán, P. Fagúndez, A. Cayota, J. Laiz and J. P. Tosar, *Anal. Chem.*, 2016, **88**, 10466–10473.
- 2 P. Li, X. Yu, W. Han, Y. Kong, W. Bao, J. Zhang, W. Zhang and Y. Gu, *ACS Sens.*, 2019, **4**, 1433–1441.
- 3 P. Zhang, M. He and Y. Zeng, *Lab Chip*, 2016, **16**, 3033–3042.
- 4 H. Im, H. Shao, Y. I. Park, V. M. Peterson, C. M. Castro, R. Weissleder and H. Lee, *Nat. Biotechnol.*, 2014, **32**, 490–495.
- 5 F. He, H. Liu, X. Guo, B. C. Yin and B. C. Ye, *Anal. Chem.*, 2017, **89**, 12968–12975.
- 6 S. Wang, L. Zhang, S. Wan, S. Cansiz, C. Cui, Y. Liu, R. Cai, C. Hong, I. T. Teng, M. Shi, Y. Wu, Y. Dong and W. Tan, *ACS Nano*, 2017, **11**, 3943–3949.
- 7 X. Chen, J. Lan, Y. Liu, L. Li, L. Yan, Y. Xia, F. Wu, C. Li, S. Li and J. Chen, *Biosens. Bioelectron.*, 2018, **102**, 582–588.
- 8 Q. Li, G. K. Tofaris and J. J. Davis, *Anal. Chem.*, 2017, **89**, 3184–3190.
- 9 H. Dong, H. Chen, J. Jiang, H. Zhang, C. Cai and Q. Shen, *Anal. Chem.*, 2018, **90**, 4507–4513.
- 10 H. Zhang, Z. Wang, Q. Zhang, F. Wang and Y. Liu, *Biosens. Bioelectron.*, 2019, **124**, 184–190.

- 11 F. He, J. Wang, B. C. Yin and B. C. Ye, *Anal. Chem.*, 2018, **90**, 8072–8079.
- 12 Y. M. Wang, J. W. Liu, G. B. Adkins, W. Shen, M. P. Trinh, L. Y. Duan, J. H. Jiang and W. Zhong, *Anal. Chem.*, 2017, **89**, 12327–12333.
- 13 D. He, S. L. Ho, H. N. Chan, H. Wang, L. Hai, X. He, K. Wang and H. W. Li, *Anal. Chem.*, 2019, **91**, 2768–2775.
- 14 L. Wang, Y. Yang, Y. Liu, L. Ning, Y. Xiang and G. Li, *Chem. Commun.*, 2019, **55**, 2708–2711.
